# Supplementary material for: Synthesis of nanostructured powders and thin films of iron sulfide from molecular precursors
Source: Royal Society of Chemistry journal article supplement (doi:10.1039/c8ra04917c), 2018-01-01
Supplement: c8ra04917c1.pdf [file c8ra04917c1.pdf]

# **Synthesis of Nanostructured Powders and Thin Films of Iron Sulfide from Molecular Precursors**

Laila Almanqur,<sup>a</sup> Inigo Vitorica-yrezabal, George Whitehead<sup>a</sup> David J. Lewis<sup>b\*</sup> and Paul O'Brien<sup>ab\*</sup>

<sup>a</sup>School of Chemistry

<sup>b</sup>School of Materials

The University of Manchester

Oxford Road, Manchester, UK M13 9PL

Electronic Supporting Information

**Table S1.** Crystallographic data for of [Fe(S<sub>2</sub>CO<sup>i</sup>Pr)<sub>3</sub>] (**3**) and [Fe(S<sub>2</sub>CO<sup>n</sup>Pr)<sub>3</sub>] (**4**)

| <b>Compound</b>                                   | <b>(3)</b>                                                      | <b>(4)</b>                                                      |
|---------------------------------------------------|-----------------------------------------------------------------|-----------------------------------------------------------------|
| <b>Empirical formula</b>                          | C <sub>12</sub> H <sub>21</sub> FeO <sub>3</sub> S <sub>6</sub> | C <sub>12</sub> H <sub>21</sub> FeO <sub>3</sub> S <sub>6</sub> |
| <b>Formula weight</b>                             | 461.50                                                          | 461.50                                                          |
| <b>Temperature/K</b>                              | 150.00(10)                                                      | 150.00(2)                                                       |
| <b>Crystal system</b>                             | monoclinic                                                      | monoclinic                                                      |
| <b>Space group</b>                                | P2 <sub>1</sub> /n                                              | P2 <sub>1</sub> /c                                              |
| <b>a/Å</b>                                        | 9.8787(2)                                                       | 13.9928(3)                                                      |
| <b>b/Å</b>                                        | 9.6899(2)                                                       | 15.6007(3)                                                      |
| <b>c/Å</b>                                        | 21.8298(5)                                                      | 9.13185(19)                                                     |
| <b>α/°</b>                                        | 90                                                              | 90                                                              |
| <b>β/°</b>                                        | 101.469(2)                                                      | 102.292(2)                                                      |
| <b>γ/°</b>                                        | 90                                                              | 90                                                              |
| <b>Volume/Å<sup>3</sup></b>                       | 2047.90(8)                                                      | 1947.76(7)                                                      |
| <b>Z</b>                                          | 4                                                               | 4                                                               |
| <b>ρ<sub>calc</sub>/g/cm<sup>3</sup></b>          | 1.497                                                           | 1.574                                                           |
| <b>μ/mm<sup>-1</sup></b>                          | 1.354                                                           | 1.423                                                           |
| <b>F(000)</b>                                     | 956.0                                                           | 956.0                                                           |
| <b>Crystal size/mm<sup>3</sup></b>                | 0.4 × 0.35 × 0.2                                                | 0.522 × 0.204 × 0.094                                           |
| <b>Radiation</b>                                  | MoKα (λ = 0.71073)                                              | MoKα (λ = 0.71073)                                              |
| <b>2Θ range for data collection/°</b>             | 4.26 to 59.988                                                  | 3.962 to 52.736                                                 |
| <b>Index ranges</b>                               | -13 ≤ h ≤ 13, -13 ≤ k ≤ 12, -29 ≤ l ≤ 27                        | -17 ≤ h ≤ 17, -19 ≤ k ≤ 19, -11 ≤ l ≤ 10                        |
| <b>Reflections collected</b>                      | 36718                                                           | 27884                                                           |
| <b>Independent reflections</b>                    | 5332 [R <sub>int</sub> = 0.0282, R <sub>sigma</sub> = 0.0191]   | 3978 [R <sub>int</sub> = 0.0217, R <sub>sigma</sub> = 0.0130]   |
| <b>Data/restraints/parameters</b>                 | 5332/0/205                                                      | 3978/0/202                                                      |
| <b>Goodness-of-fit on F<sup>2</sup></b>           | 1.029                                                           | 1.035                                                           |
| <b>Final R indexes [I ≥ 2σ (I)]</b>               | R <sub>1</sub> = 0.0231, wR <sub>2</sub> = 0.0517               | R <sub>1</sub> = 0.0177, wR <sub>2</sub> = 0.0439               |
| <b>Final R indexes [all data]</b>                 | R <sub>1</sub> = 0.0288, wR <sub>2</sub> = 0.0537               | R <sub>1</sub> = 0.0194, wR <sub>2</sub> = 0.0446               |
| <b>Largest diff. peak/hole / e Å<sup>-3</sup></b> | 0.43/-0.40                                                      | 0.35/-0.22                                                      |

**Table S2.** Bond length and angles for complex (3)

| Bond length and angle | Data       |
|-----------------------|------------|
| Fe1- S7               | 2.2958(4)  |
| Fe1- S14              | 2.3074(4)  |
| Fe1- S21              | 2.2846(4)  |
| Fe1- S2               | 2.3177(4)  |
| Fe1- S16              | 2.2972(4)  |
| Fe1- S9               | 2.2981(4)  |
| S7- C3                | 1.6907(13) |
| S14- C10              | 1.6846(13) |
| S21- C17              | 1.6922(14) |
| S2- C3                | 1.6937(13) |
| S16- C17              | 1.6954(14) |
| S9- C10               | 1.6954(14) |
| S7- Fe1- S14          | 95.195(14) |
| S14- Fe1- S2          | 96.812(14) |
| S16- Fe1- S9          | 92.051(14) |

**Table S3.** Bond length and angles for complex (4)

| Bond length and angle | Data        |
|-----------------------|-------------|
| Fe1- S6               | 2.3013(3)   |
| Fe1- S2               | 2.3155(4)   |
| Fe1- S1               | 2.2948(4)   |
| Fe1- S5               | 2.2931(4)   |
| Fe1- S3               | 2.3161(4)   |
| Fe1- S4               | 2.3050(4)   |
| S6- C9                | 1.6908(13)  |
| S2- C1                | 1.6934(12)  |
| S1- C1                | 1.6851(13)  |
| S5- C9                | 1.6971(13)  |
| S3- C5                | 1.6888(13)  |
| S4- C5                | 1.6851(13)  |
| S6- Fe1- S2           | 99.464(13)  |
| S2- Fe1- S3           | 159.345(14) |
| S1- Fe1- S6           | 170.879(14) |

**Table S4.** Decomposition data of precursors  $[\text{Fe}(\text{S}_2\text{COMe})_3]$  (**1**),  $[\text{Fe}(\text{S}_2\text{COEt})_3]$  (**2**),  $[\text{Fe}(\text{S}_2\text{CO}^i\text{Pr})_3]$  (**3**) and  $[\text{Fe}(\text{S}_2\text{CO}^n\text{Pr})_3]$  (**4**).

| Complex                                                  | Iron sulfide   |             | Mass loss% |            | Decomposition temperature °C |
|----------------------------------------------------------|----------------|-------------|------------|------------|------------------------------|
|                                                          | Phase          | Calculated% | Found%     |            |                              |
| <b>1</b> $[\text{Fe}(\text{S}_2\text{COMe})_3]$          | $\text{FeS}_2$ | 31.8%       | 30.2%      | 250-350 °C |                              |
|                                                          | $\text{FeS}$   | 23.3%       | 24.5%      | 500-550 °C |                              |
| <b>2</b> $[\text{Fe}(\text{S}_2\text{COEt})_3]$          | $\text{FeS}_2$ | 28.6%       | 28.3%      | 290-350 °C |                              |
|                                                          | $\text{FeS}$   | 20.9%       | 21.2%      | 500-550 °C |                              |
| <b>3</b> $[\text{Fe}(\text{S}_2\text{CO}^i\text{Pr})_3]$ | $\text{FeS}_2$ | 26%         | 26.9%      | 270-300 °C |                              |
|                                                          | $\text{FeS}$   | 19.1%       | 20%        | 400-450 °C |                              |
| <b>4</b> $[\text{Fe}(\text{S}_2\text{CO}^n\text{Pr})_3]$ | $\text{FeS}_2$ | 26%         | 25.1%      | 200-250 °C |                              |
|                                                          | $\text{FeS}$   | 19.1%       | 18.8%      | 500-550 °C |                              |

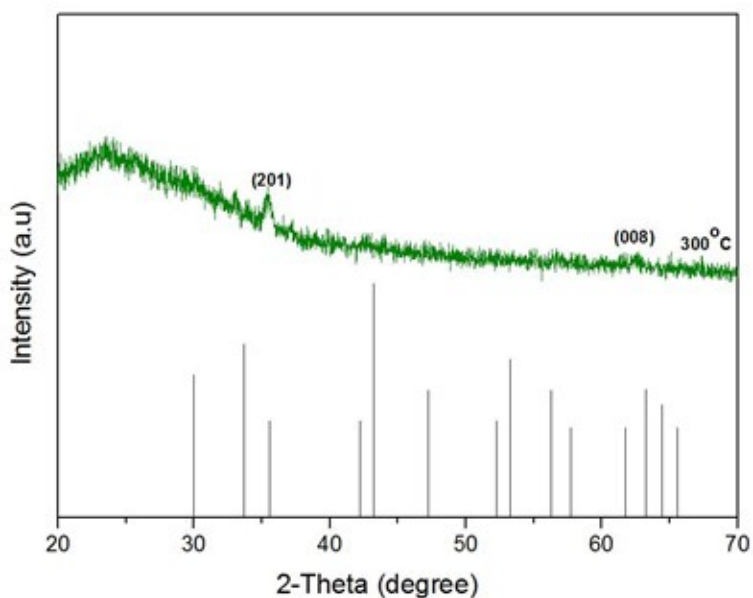

**Figure S1.** The XRD patterns of iron sulfide thin films prepared by spin coating method from  $[\text{Fe}(\text{S}_2\text{COMe})_3]$  complex heated at 300°C for 60 min. The black sticks represent hexagonal troilite phase (FeS). (ICDD: 01-075-2165).

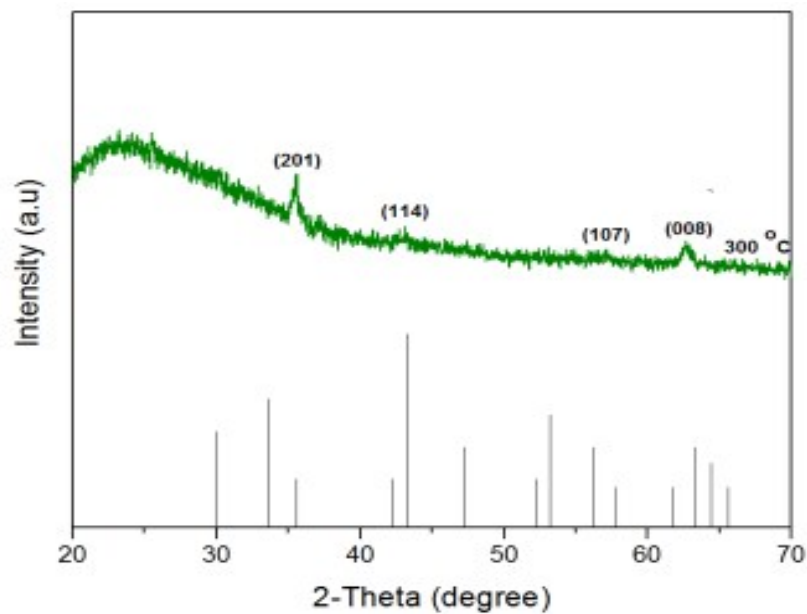

**Figure S2.** The XRD patterns of iron sulfide thin films prepared by spin coating method from [Fe(S<sub>2</sub>CO<sup>i</sup>Pr)<sub>3</sub>] complex heated at 300 °C for 60 min. The black sticks represent hexagonal troilite phase (FeS). (ICDD: 01-075-2165).

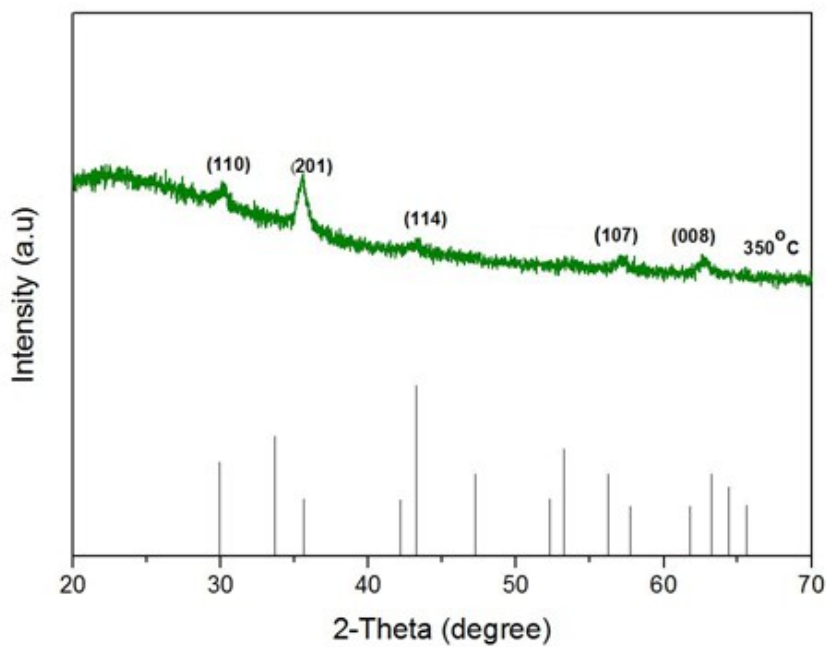

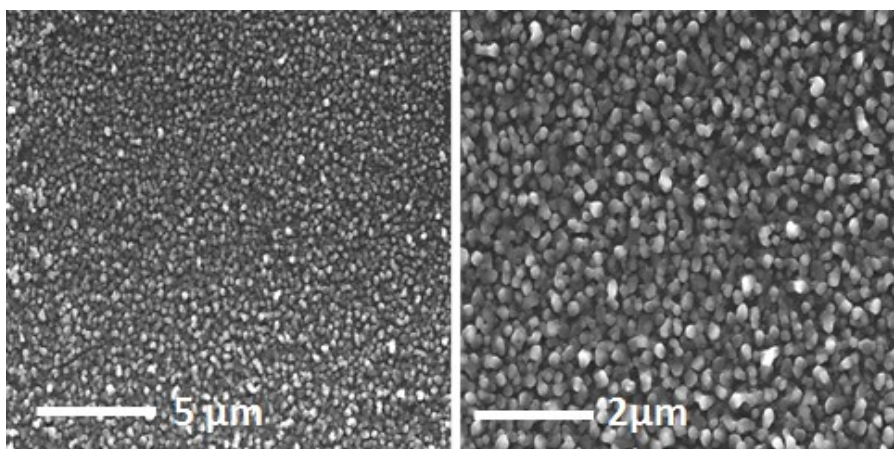

**Figure S4.** SEM images of iron sulfide thin films from complex  $[\text{Fe}(\text{S}_2\text{COMe})_3]$  deposited by the spin coating method at  $300\text{ }^\circ\text{C}$

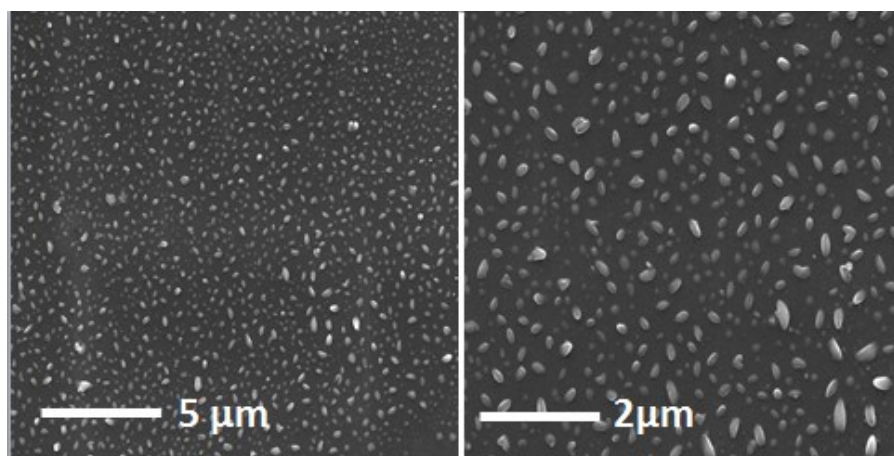

**Figure S5.** SEM images of iron sulfide thin films from complex  $[\text{Fe}(\text{S}_2\text{CO}'\text{pr})_3]$  deposited by the spin coating method at  $300\text{ }^\circ\text{C}$

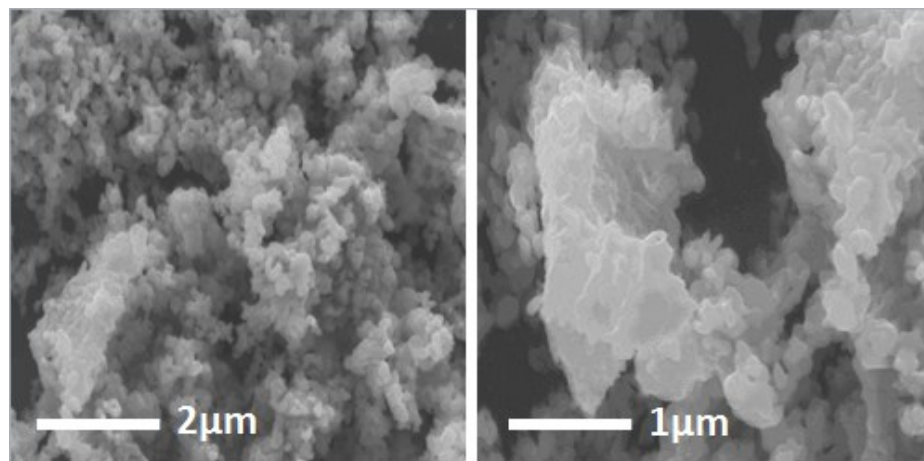

**Figure S6.** SEM images of iron sulfide thin films from complex  $[\text{Fe}(\text{S}_2\text{CO}^n\text{pr})_3]$  deposited by the spin coating method at  $350\text{ }^\circ\text{C}$

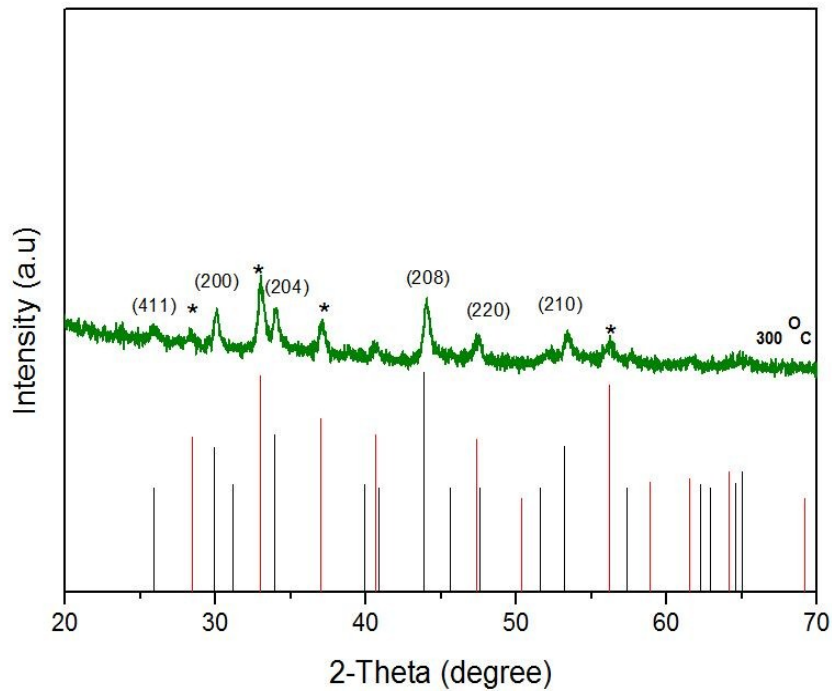

**Figure S7.** The XRD patterns of iron sulfide nanoparticles prepared by melt method from  $[\text{Fe}(\text{S}_2\text{COMe})_3]$  complex heated at 300 °C for 60 min. The black sticks represent hexagonal pyrrhotite phase ( $\text{Fe}_{1-x}\text{S}$ ). The red sticks represent pyrite  $\text{FeS}_2$  phase (denoted by symbol (\*)).

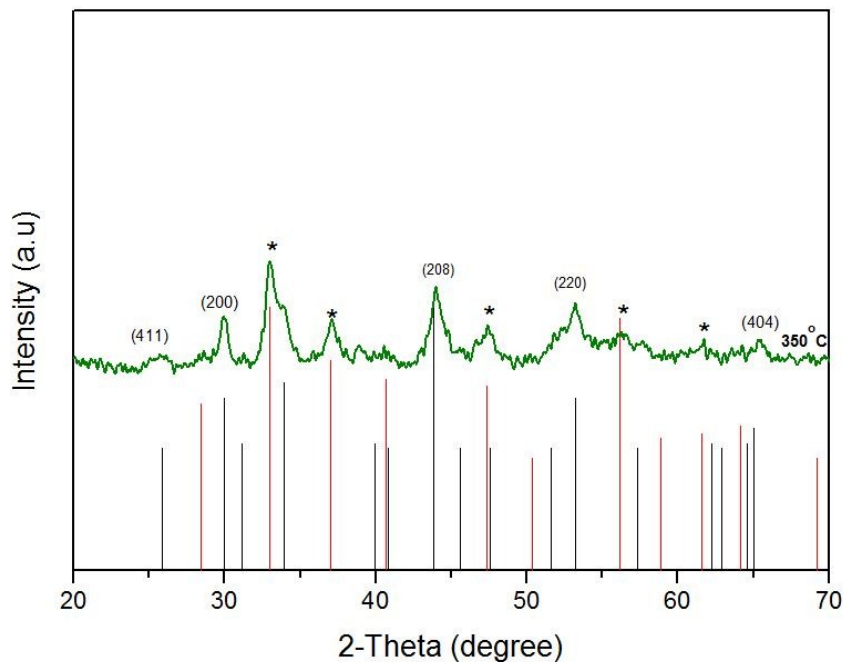

**Figure S8.** The XRD patterns of iron sulfide thin films prepared by melt method from  $[\text{Fe}(\text{S}_2\text{COEt})_3]$  complex heated at 350 °C for 60 min. The black sticks represent hexagonal pyrrhotite phase ( $\text{Fe}_{1-x}\text{S}$ ). The red sticks represent pyrite  $\text{FeS}_2$  phase (denoted by symbol (\*)).



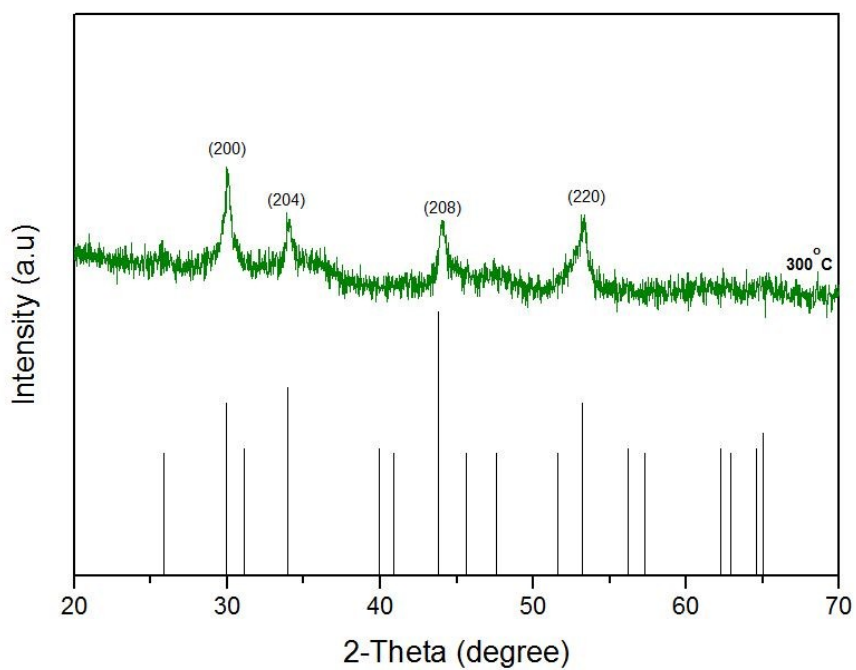

**Figure S9.** The XRD patterns of iron sulfide nanoparticles prepared by melt method from  $[\text{Fe}(\text{S}_2\text{CO}^n\text{Pr})_3]$  complex heated at 300 °C for 60 min. The black sticks represent hexagonal pyrrhotite phase ( $\text{Fe}_{1-x}\text{S}$ ).

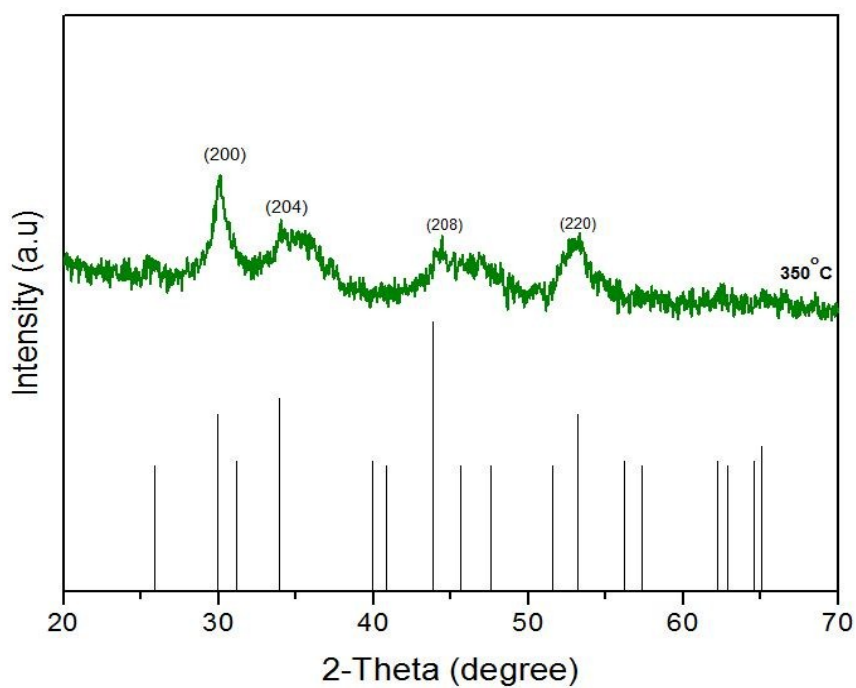

**Figure S10.** The XRD patterns of iron sulfide nanoparticles prepared by melt method from  $[\text{Fe}(\text{S}_2\text{CO}^n\text{Pr})_3]$  complex heated at 350 °C for 60 min. The black sticks represent hexagonal pyrrhotite phase ( $\text{Fe}_{1-x}\text{S}$ ).

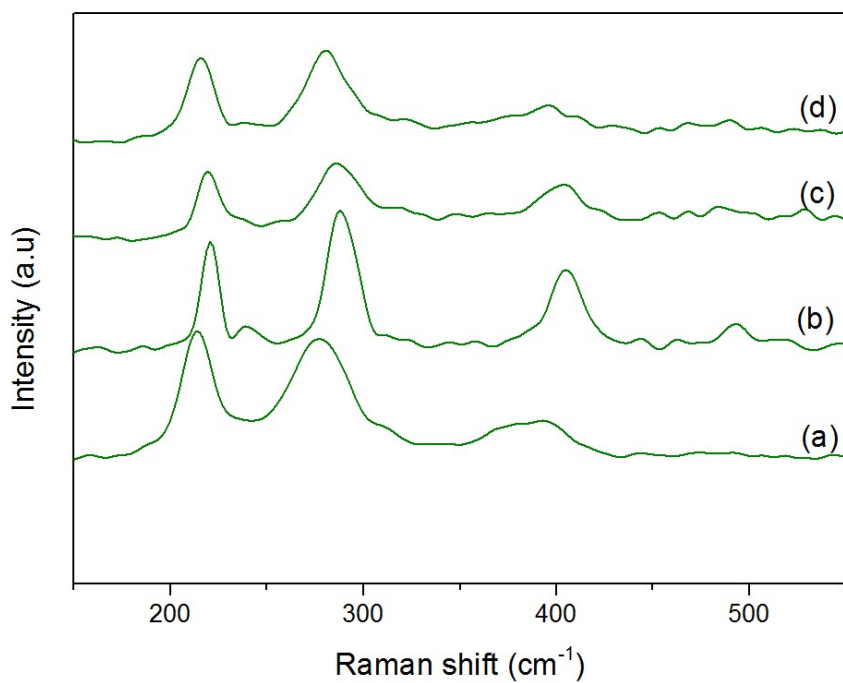

**Figure S11.** Raman spectra of hexagonal pyrrhotite phase ( $\text{Fe}_{1-x}\text{S}$ ) from complexes  $[\text{Fe}(\text{S}_2\text{COMe})_3]$  **(a)** at 300 °C ,  $[\text{Fe}(\text{S}_2\text{COEt})_3]$  **(b)** at at 350 °C ,  $[\text{Fe}(\text{S}_2\text{CO}^i\text{Pr})_3]$  **(c)** at 300 °C and  $[\text{Fe}(\text{S}_2\text{CO}^n\text{Pr})_3]$  **(d)** at 350 °C.

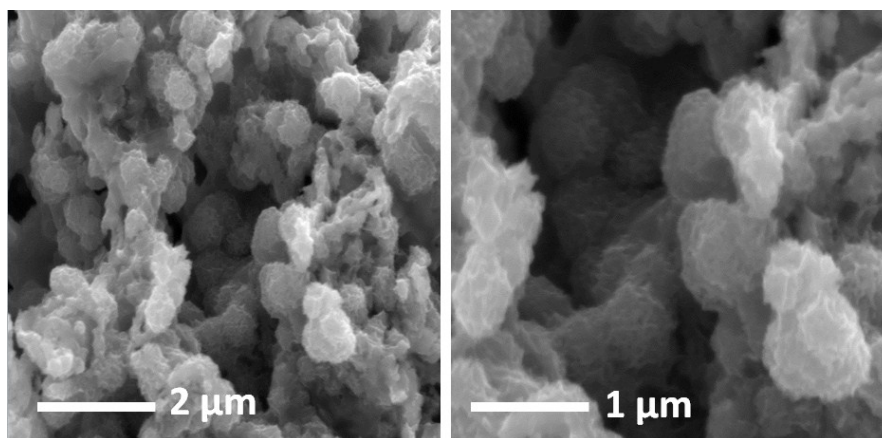

**Figure S12.** SEM images of iron sulfide nanoparticles from complex  $[\text{Fe}(\text{S}_2\text{COMe})_3]$  by melt method at 300 °C

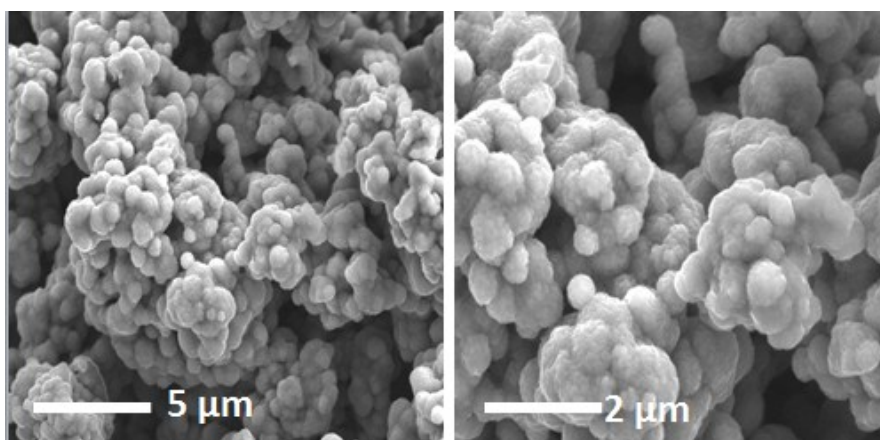

**Figure S13.** SEM images of iron sulfide nanoparticles from complex  $[\text{Fe}(\text{S}_2\text{COEt})_3]$  by melt method at 350 °C

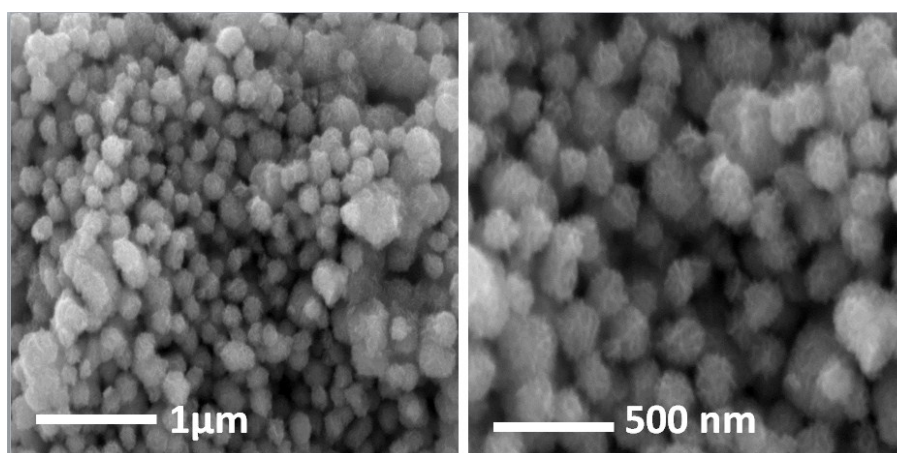

**Figure S14.** SEM images of iron sulfide nanoparticles from complex  $[\text{Fe}(\text{S}_2\text{CO}^i\text{Pr})_3]$  by melt method at 350 °C

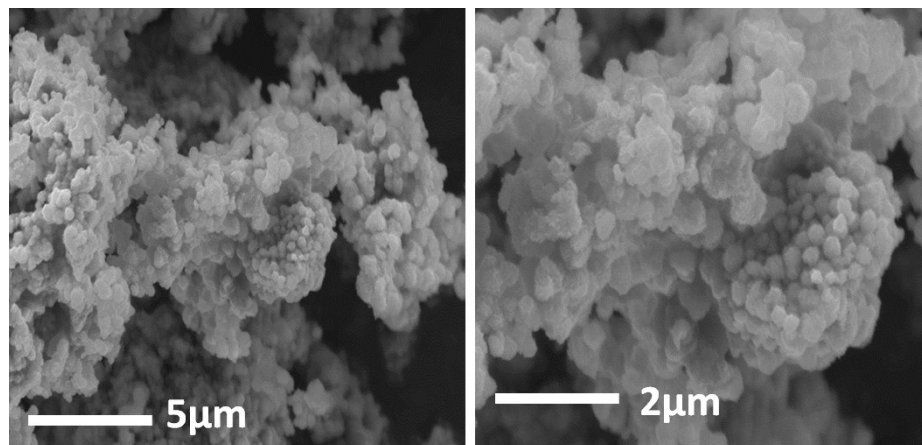

**Figure S15.** SEM images of iron sulfide nanoparticles from complex  $[\text{Fe}(\text{S}_2\text{CO}^o\text{Pr})_3]$  using melt method at 300 °C

**Table S5.** Elemental composition of Fe and S in iron sulfide thin films heated at 500 °C found by EDX.

| <b>Complex</b>                                            | <b>Fe (%)</b> | <b>S (%)</b> | <b>Ratio (Fe:S)</b> |
|-----------------------------------------------------------|---------------|--------------|---------------------|
| [Fe(S <sub>2</sub> COMe) <sub>3</sub> ] (1)               | 49.7          | 50.0         | FeS                 |
| [Fe(S <sub>2</sub> COEt) <sub>3</sub> ] (2)               | 49.3          | 50.6         | FeS                 |
| [Fe(S <sub>2</sub> CO <sup>i</sup> Pr) <sub>3</sub> ] (3) | 49.9          | 50.0         | FeS                 |
| [Fe(S <sub>2</sub> CO <sup>n</sup> Pr) <sub>3</sub> ] (4) | 49.4          | 50.1         | FeS                 |

The average crystallite size of iron sulfide from precursor (1) to (4) at two different temperatures 400 and 500 °C were calculated using the Schererr equation:

$$L = K\lambda / B \cos(\theta)$$

Where L, K,  $\lambda$ , B and  $\theta$  are crystallite size, 0.94, the X-ray wavelength, the full width at half maximum of the peak and Bragg diffraction angle respectively.<sup>1</sup>

**Table S6.** The average crystallite size of nanocrystals from complex (1), (2), (3) and (4) at growth temperature of 400 °C and 500 °C

| <b>Precursor</b>                                          | <b>Average crystallite size at 400 °C</b> | <b>Average crystallite size at 500 °C</b> |
|-----------------------------------------------------------|-------------------------------------------|-------------------------------------------|
| [Fe(S <sub>2</sub> COMe) <sub>3</sub> ] (1)               | 22.3 nm                                   | 28.6 nm                                   |
| [Fe(S <sub>2</sub> COEt) <sub>3</sub> ] (2)               | 14.2 nm                                   | 17.7 nm                                   |
| [Fe(S <sub>2</sub> CO <sup>i</sup> Pr) <sub>3</sub> ] (3) | 7.6 nm                                    | 10.2 nm                                   |
| [Fe(S <sub>2</sub> CO <sup>n</sup> Pr) <sub>3</sub> ] (4) | 11.2 nm                                   | 14 nm                                     |

**Table S7.** Elemental composition of Fe and S in iron sulfide samples heated at 500 °C found by ICP-OES.

| <b>Complex</b>                                            | <b>Fe (%)</b> | <b>S (%)</b> | <b>Ratio (Fe:S)</b>  |
|-----------------------------------------------------------|---------------|--------------|----------------------|
| [Fe(S <sub>2</sub> COMe) <sub>3</sub> ] (1)               | 44.0          | 55.9         | Fe <sub>0.78</sub> S |
| [Fe(S <sub>2</sub> COEt) <sub>3</sub> ] (2)               | 44.3          | 55.6         | Fe <sub>0.79</sub> S |
| [Fe(S <sub>2</sub> CO <sup>i</sup> Pr) <sub>3</sub> ] (3) | 45.3          | 54.6         | Fe <sub>0.82</sub> S |
| [Fe(S <sub>2</sub> CO <sup>n</sup> Pr) <sub>3</sub> ] (4) | 44.0          | 55.7         | Fe <sub>0.79</sub> S |

**Table S8.** Elemental composition of Fe and S in iron sulfide samples heated at 500 °C found by EDX.

| <b>Complex</b>                                            | <b>Fe (%)</b> | <b>S (%)</b> | <b>Ratio (Fe:S)</b>  |
|-----------------------------------------------------------|---------------|--------------|----------------------|
| [Fe(S <sub>2</sub> COMe) <sub>3</sub> ] (1)               | 44.0          | 55.8         | Fe <sub>0.78</sub> S |
| [Fe(S <sub>2</sub> COEt) <sub>3</sub> ] (2)               | 44.2          | 55.6         | Fe <sub>0.79</sub> S |
| [Fe(S <sub>2</sub> CO <sup>i</sup> Pr) <sub>3</sub> ] (3) | 45.1          | 54.3         | Fe <sub>0.83</sub> S |
| [Fe(S <sub>2</sub> CO <sup>n</sup> Pr) <sub>3</sub> ] (4) | 44.2          | 55.9         | Fe <sub>0.79</sub> S |

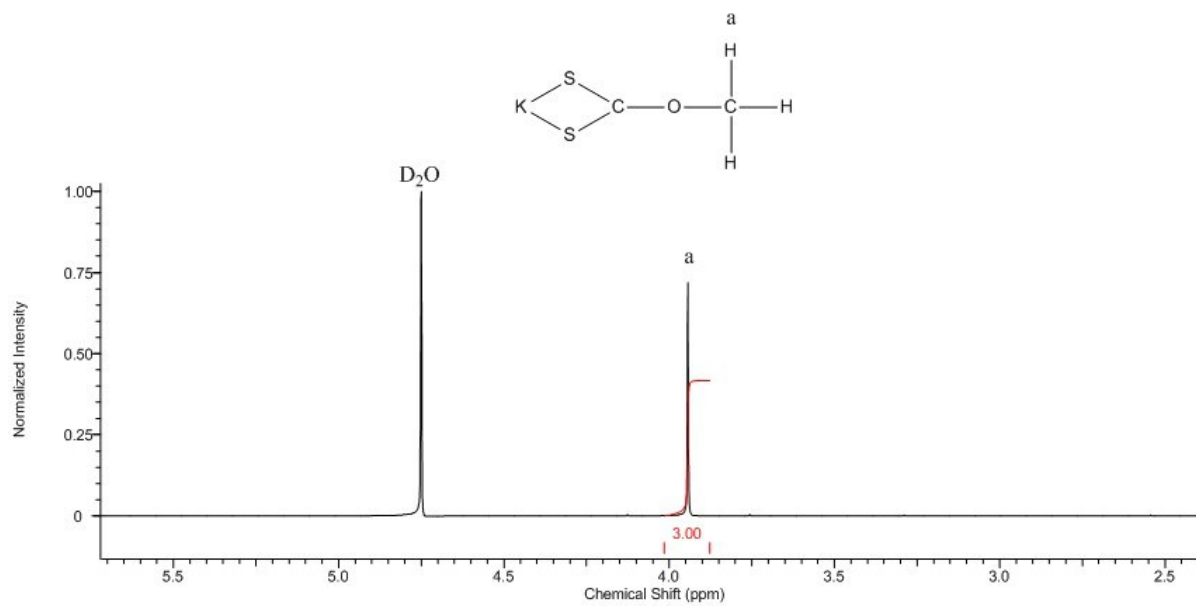

**Figure S16.** <sup>1</sup>H NMR spectra of iron (III) methylxanthate, [Fe(S<sub>2</sub>COMe)]<sub>3</sub>(**1**)

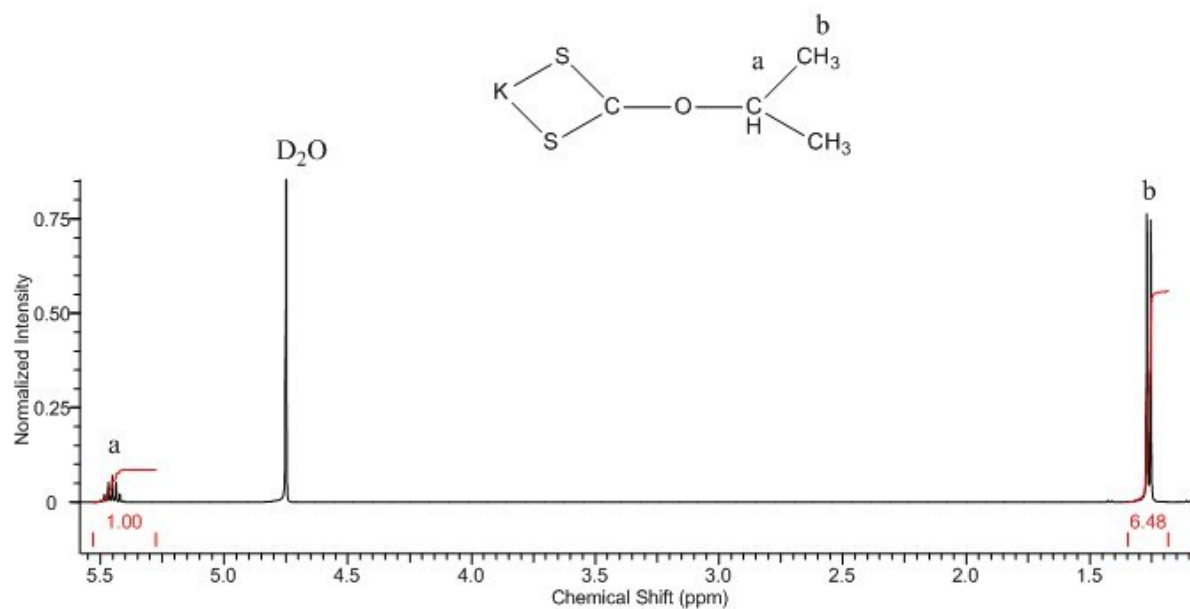

**Figure S17.**  $^1\text{H}$  NMR spectra of iron (III) isopropylxanthate  $[\text{Fe}(\text{S}_2\text{CO}^i\text{Pr})_3]$  (**3**)

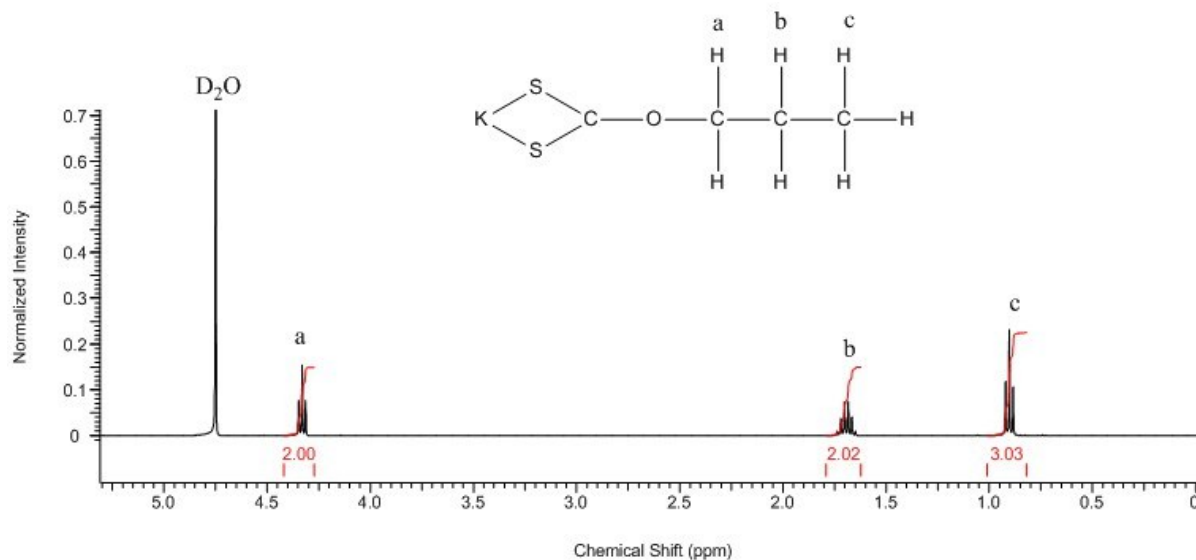

**Figure S18.**  $^1\text{H}$  NMR spectra of iron (III) n-propylxanthate  $[\text{Fe}(\text{S}_2\text{CO}^n\text{Pr})_3]$  (**4**)

## References

1. L. Pallon, R. Olsson, D. Liu, A. Pourrahimi, M. Hedenqvist, A. Hoang, S. Gubanski and U. Gedde, *J. Mater. Chem. A*, 2015, **3**, 7523-7534.
